# Supplementary material
Source: ML conference proceedings conference paper supplement (https://proceedings.neurips.cc/paper_files/paper/2023/hash/240cc9ac4789351653d13cfcba4ee85c-Abstract.html)
Supplement: Supplementary file 1 [file 240cc9ac4789351653d13cfcba4ee85c-Supplemental-Conference.zip]

Archive with 9 entries (9 files):
- Training_Free_VOS.pdf
- videos/output0.mp4
- videos/output1.mp4
- videos/output2.mp4
- videos/output3.mp4
- videos/output4.mp4
- videos/output5.mp4
- videos/output6.mp4
- videos/output7.mp4
